# Supplementary material for: Loss of PTEN expression in breast cancer: association with clinicopathological characteristics and prognosis
Source: Oncotarget. 2017 Mar 31;8(19):32043–54. doi: 10.18632/oncotarget.16761 (PMC5458267; doi:10.18632/oncotarget.16761)
Supplement: Supplementary file 1 [file oncotarget-08-32043-s001.pdf]

# Loss of PTEN expression in breast cancer: association with clinicopathological characteristics and prognosis

## Supplementary Materials

**Supplementary Table 1: Quality of the included studies based on the newcastle-ottawa scale**

| Studies                                | Selection                                |                                     | Comparability          |                                       | Outcome               |                                    |                       | Total core |
|----------------------------------------|------------------------------------------|-------------------------------------|------------------------|---------------------------------------|-----------------------|------------------------------------|-----------------------|------------|
|                                        | Representativeness of the exposed cohort | Selection of the non exposed cohort | Assessment of exposure | Outcome not present at start of study | Assessment of outcome | Follow-up long enough for outcomes | Adequacy of follow up |            |
| Bose et al. (2002, USA) [11]           | 1                                        | 1                                   | 1                      | 1                                     | 1                     | 1                                  | 1                     | 8          |
| Capodanno et al. (2009, Italy) [8]     | 1                                        | 1                                   | 1                      | 1                                     | 1                     | 0                                  | 1                     | 6          |
| Wang et al. (2016, China) [12]         | 1                                        | 1                                   | 1                      | 1                                     | 0                     | 1                                  | 1                     | 6          |
| Lima Lin et al. (2014, Brazil) [13]    | 1                                        | 1                                   | 1                      | 1                                     | 1                     | 1                                  | 1                     | 7          |
| Lebok et al. (2015, Germany) [14]      | 1                                        | 1                                   | 1                      | 1                                     | 1                     | 1                                  | 1                     | 7          |
| Palmaru et al. (2013, Denmark) [15]    | 1                                        | 1                                   | 1                      | 1                                     | 0                     | 1                                  | 1                     | 6          |
| Noh et al. (2008, Korea) [5]           | 1                                        | 1                                   | 1                      | 1                                     | 1                     | 1                                  | 0                     | 6          |
| Li et al. (2015, China) [16]           | 1                                        | 1                                   | 1                      | 1                                     | 0                     | 1                                  | 0                     | 5          |
| Golmohammadi et al. (2016, Iran) [17]  | 1                                        | 1                                   | 1                      | 1                                     | 1                     | 1                                  | 0                     | 6          |
| Cuorvo et al. (2014, Italy) [18]       | 1                                        | 1                                   | 1                      | 1                                     | 1                     | 1                                  | 1                     | 7          |
| Arthur et al. (2014, UK) [19]          | 1                                        | 1                                   | 1                      | 1                                     | 1                     | 1                                  | 1                     | 7          |
| Beg et al. (2015, Saudi Arabia)[20]    | 1                                        | 1                                   | 1                      | 1                                     | 1                     | 1                                  | 1                     | 7          |
| Inanc et al. (2014, Turkey) [21]       | 1                                        | 1                                   | 1                      | 1                                     | 1                     | 1                                  | 0                     | 6          |
| Beelen et al. (2014, Netherlands) [22] | 1                                        | 1                                   | 1                      | 1                                     | 1                     | 1                                  | 1                     | 7          |
| Lazaridis et al. (2014, Germany) [34]  | 1                                        | 1                                   | 1                      | 1                                     | 1                     | 1                                  | 1                     | 7          |
| Chung et al. (2004, Korea) [23]        | 1                                        | 1                                   | 1                      | 1                                     | 1                     | 1                                  | 0                     | 7          |
| Iqbalet al. (2012, China) [6]          | 1                                        | 1                                   | 1                      | 1                                     | 1                     | 1                                  | 1                     | 8          |
| Szmichet al. (2015, Poland) [24]       | 1                                        | 1                                   | 1                      | 1                                     | 0                     | 1                                  | 1                     | 6          |
| Stern et al. (2015, USA) [25]          | 1                                        | 1                                   | 1                      | 1                                     | 1                     | 1                                  | 1                     | 8          |
| Sueta et al. (2015, Japan) [26]        | 1                                        | 1                                   | 1                      | 1                                     | 1                     | 1                                  | 1                     | 7          |
| Perez et al. (2015, China) [27]        | 1                                        | 1                                   | 1                      | 1                                     | 1                     | 0                                  | 1                     | 7          |
| Chen et al. (2014, China) [28]         | 1                                        | 1                                   | 1                      | 1                                     | 1                     | 1                                  | 1                     | 7          |
| Tang et al. (2014, China) [31]         | 1                                        | 1                                   | 1                      | 1                                     | 0                     | 1                                  | 0                     | 6          |
| Lu et al. (2006, China) [33]           | 1                                        | 1                                   | 1                      | 1                                     | 1                     | 0                                  | 1                     | 6          |
| Tian et al. (2008, China) [32]         | 1                                        | 1                                   | 1                      | 1                                     | 1                     | 1                                  | 0                     | 6          |
| Huang et al. (2012, China) [29]        | 1                                        | 1                                   | 1                      | 1                                     | 1                     | 1                                  | 0                     | 7          |
| Fang et al. (2013, China) [30]         | 1                                        | 1                                   | 1                      | 1                                     | 1                     | 1                                  | 1                     | 7          |
